# Supplementary material for: Probing the nanoscale organisation and multivalency of cell surface receptors: DNA origami nanoarrays for cellular studies with single-molecule control
Source: Royal Society of Chemistry journal article supplement (doi:10.1039/c9fd00023b), 2019-01-01
Supplement: c9fd00023b1.pdf [file c9fd00023b1.pdf]

## Supplementary Methods

### Peptide and Amino Modifications to DNA Origami

The pointed triangle design was selected due to its lower tendency to aggregate and to exhibit blunt end stacking effects<sup>1</sup>. Eighteen peptide and 15 amino anchor modifications were made to the triangle origami design. For the peptide modifications, the original strands that hybridise to the m13m18 backbone were extended with the same sequence (AGTTGTGGATCCTACT). This extended sequence was complementary to the acrydite peptide linker when was conjugated to the peptide. Strands selected for the amino anchors were modified with a poly-T extension, complementary for poly-A 6 carbon amino anchor. All modifications are listed in Supplementary Table 1. During synthesis of the DNA origami, peptide and amino modification were added at a 20x excess to the concentration of the available modification sites.

**Supplementary Table 1.** Modified strands from the triangular DNA origami design originally published by Rothmund<sup>1</sup>. Mapped strand indicates which strand is modified from Rothmund's original design. Columns 3-5 indicate if the modification is to be included in the 6, 12 or 18 peptide designs.

| Mapped Strand           | Modification | In 18 Pep? | In 12 Pep? | In 6 Pep? | Sequence                                                      |
|-------------------------|--------------|------------|------------|-----------|---------------------------------------------------------------|
| b32                     | Pep          | Yes        | Yes        | Yes       | AATACTGCGGAATCGTAGGGGGTAATAGTAAAATGTTTAGACTAGTTGTGGATCCTACT   |
| c05                     | Amino        | Yes        | Yes        | Yes       | TGGCAATTTTTAACGTCAGATGAAAACAATAACGGATTCGTTTTTTTTTTTTTTTTTT    |
| c13                     | Amino        | Yes        | Yes        | Yes       | GATTATACACAGAAATAAGAAATACCAAGTTACAAAATCTTTTTTTTTTTTTTTTTTT    |
| c32                     | Pep          | Yes        | Yes        | Yes       | TCITTTGATTAGTAATAGTCTGTCCATCACGCAAATTAACCGTAGTTGTGGATCCTACT   |
| b20                     | Pep          | Yes        | Yes        | No        | TAATTGCTTTACCCTGACTATTATGAGGCATAGTAAGAGCAGTTGTGGATCCTACT      |
| a20                     | Pep          | Yes        | Yes        | No        | TTGACGGAAATACATACATAAAGGGCGCTAATATCAGAGAAGTTGTGGATCCTACT      |
| b30                     | Pep          | Yes        | No         | No        | TGCTGTAGATCCCCCTCAAATGCTCGAGAGGCTTTTGCAAGTTGTGGATCCTACT       |
| a32                     | Pep          | Yes        | Yes        | Yes       | CAGAAGGAAACCGAGGTTTTTAAGAAAAGTAAGCAGATAGCCGAGTTGTGGATCCTACT   |
| b05                     | Amino        | Yes        | Yes        | Yes       | ACAGTCAAAGAGAATCGATGAACGACCCCGTTGATAATCTTTTTTTTTTTTTTTTTTT    |
| a05                     | Amino        | Yes        | Yes        | Yes       | TTTGATGATTAAGAGGCTGAGACTTGCTCAGTACCAGGCGTTTTTTTTTTTTTTTTTT    |
| b13                     | Amino        | Yes        | Yes        | Yes       | CGTTCTAGTCAGGTCATTGCTGACAGGAAGATTGTATAATTTTTTTTTTTTTTTTTTT    |
| a13                     | Amino        | Yes        | Yes        | Yes       | TTTAACGGTTCCGAACCTATTATTAGGGTTGATATAAGTATTTTTTTTTTTTTTTTTTT   |
| c30                     | Pep          | Yes        | No         | No        | TAAACATTAGAAGAACTCAAACTTTTATAATCAGTGAGAGTTGTGGATCCTACT        |
| c20                     | Pep          | Yes        | Yes        | No        | GAATACGTAACAGGAAAAACGCTCTAAACAGGAGGCCGAAGTTGTGGATCCTACT       |
| A37                     | Pep          | Yes        | No         | No        | AGAGAATAACATAAAAAACAGGGAAGCGCATTAAAGTTGTGGATCCTACT            |
| b37                     | Pep          | Yes        | No         | No        | ACAGGTAGAAAGATTATCAGTTGAGATTAGAGTTGTGGATCCTACT                |
| a33                     | Amino        | Yes        | Yes        | Yes       | CCTTTTTTCATTTAACAATTTTATAGGATTAGTTTTTTTTTTTTTTTTTTTTTT        |
| a30                     | Pep          | Yes        | No         | No        | GAGCCAGCGAATACCCAAAAGAACATGAAATAGCAATAGCAGTTGTGGATCCTACT      |
| b33                     | Amino        | Yes        | Yes        | Yes       | AGGGATAGCTCAGAGCCACCCCATGTCAATTTTTTTTTTTTTTTTTTTTTTT          |
| c33                     | Amino        | Yes        | Yes        | Yes       | CGCGTCTGATAGGAACGCCATCACTTTTACATTTTTTTTTTTTTTTTTTTTTTT        |
| c37                     | Pep          | Yes        | No         | No        | CGAGAAAGGAAGGGAAGCGTACTATGGTTGCTAGTTGTGGATCCTACT              |
| b42                     | Amino        | Yes        | Yes        | Yes       | AGACGTTACCATGTACCGTAACACCCCTCAGAACCAGCCATTTTTTTTTTTTTTTTTTT   |
| a42                     | Amino        | Yes        | Yes        | Yes       | AGAGTCAAAAATCAATATATGTGATGAACAAACATCAAGTTTTTTTTTTTTTTTTTTTTTT |
| b50                     | Amino        | Yes        | Yes        | Yes       | AGCGTAACACAACTACAACGCCTATCACCGTACTCAGGTTTTTTTTTTTTTTTTTTTTTT  |
| a50                     | Amino        | Yes        | Yes        | Yes       | ACATAGCGCTGTAATCGTCGCTATTCAATTTCAATACCTTTTTTTTTTTTTTTTTTTTTTT |
| c61                     | Pep          | Yes        | Yes        | No        | TTCCAGTCTTATAAATCAAAGAGAACCATCACCAATAGTTGTGGATCCTACT          |
| c49                     | Pep          | Yes        | No         | No        | GTTTGCCTACGCTGGTTTGCCCAAGGAGGCCCGGATTAGTTGTGGATCCTACT         |
| B41                     | Pep          | No         | Yes        | Yes       | CGACCTGCGGTCAATCATAAGGGAACGGAACAATTATTAGTTGTGGATCCTACT        |
| C41                     | Pep          | No         | Yes        | Yes       | TTTCACGAGCCTGCGCTGAGAGAAAGCCGGAACGTTGAGTTGTGGATCCTACT         |
| A41                     | Pep          | No         | Yes        | Yes       | TTTCCTTAGCACTCATCGAGAACAATAGCAGCCTTTACAGAGTTGTGGATCCTACT      |
| c42                     | Amino        | Yes        | Yes        | Yes       | GTAACCGTCTTTCATCAACATTAATTTTTTTGTTAAATCATTTTTTTTTTTTTTTTTTT   |
| c50                     | Amino        | Yes        | Yes        | Yes       | GGATAGGTACCCGTCGGATTCTCTAAACGTTAATTTTTTTTTTTTTTTTTTTTTTT      |
| b49                     | Pep          | Yes        | No         | No        | TATCATCGTTGAAAGAGGACAGATGGAAGAAAAATCTACGAGTTGTGGATCCTACT      |
| a49                     | Pep          | Yes        | No         | No        | AGCATGTATTTTCATCGTAGGAATCAAACGATTTTTTTGTTAGTTGTGGATCCTACT     |
| b61                     | Pep          | Yes        | Yes        | No        | AAAACACTTAATCTTGACAAGAATTAATCATTTGTGAATTAGTTGTGGATCCTACT      |
| a61                     | Pep          | Yes        | Yes        | No        | GCGCCTGTTATTCTAAGAACGCGATTCCAGAGCCTAATTTAGTTGTGGATCCTACT      |
| Acrydite Peptide linker | -            | Yes        | Yes        | Yes       | 5ACryd/AGTAGGATCCACAAT                                        |
| Amino Anchor            | -            | Yes        | Yes        | Yes       | 5AmMC6/AAAAAAAAAAAAAAAAAAAA                                   |

### Supplementary References:

1. P. W. K. Rothmund, *Nature*, 2006, **440**, 297-302.

## Supplementary Figures:

### Supplementary Figure 1

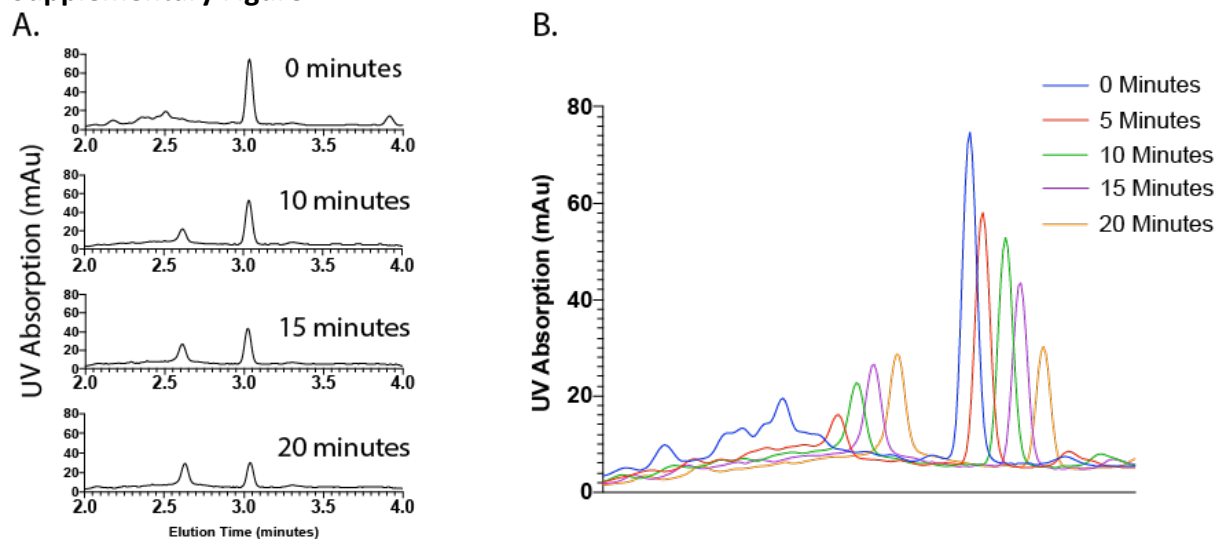

**Supplementary Figure 1:** HPLC verification of conjugation between cRGDfC peptide and acrydite modified ssDNA. A) HPLC elution time of unconjugated ssDNA (1) and conjugated product (2) with increasing UV exposure time from 0 to 20 minutes. B) HPLC traces have been overlaid and shifted laterally for visual clarity of increasing conjugate yield with increasing UV exposure.

## Supplementary Figure 2

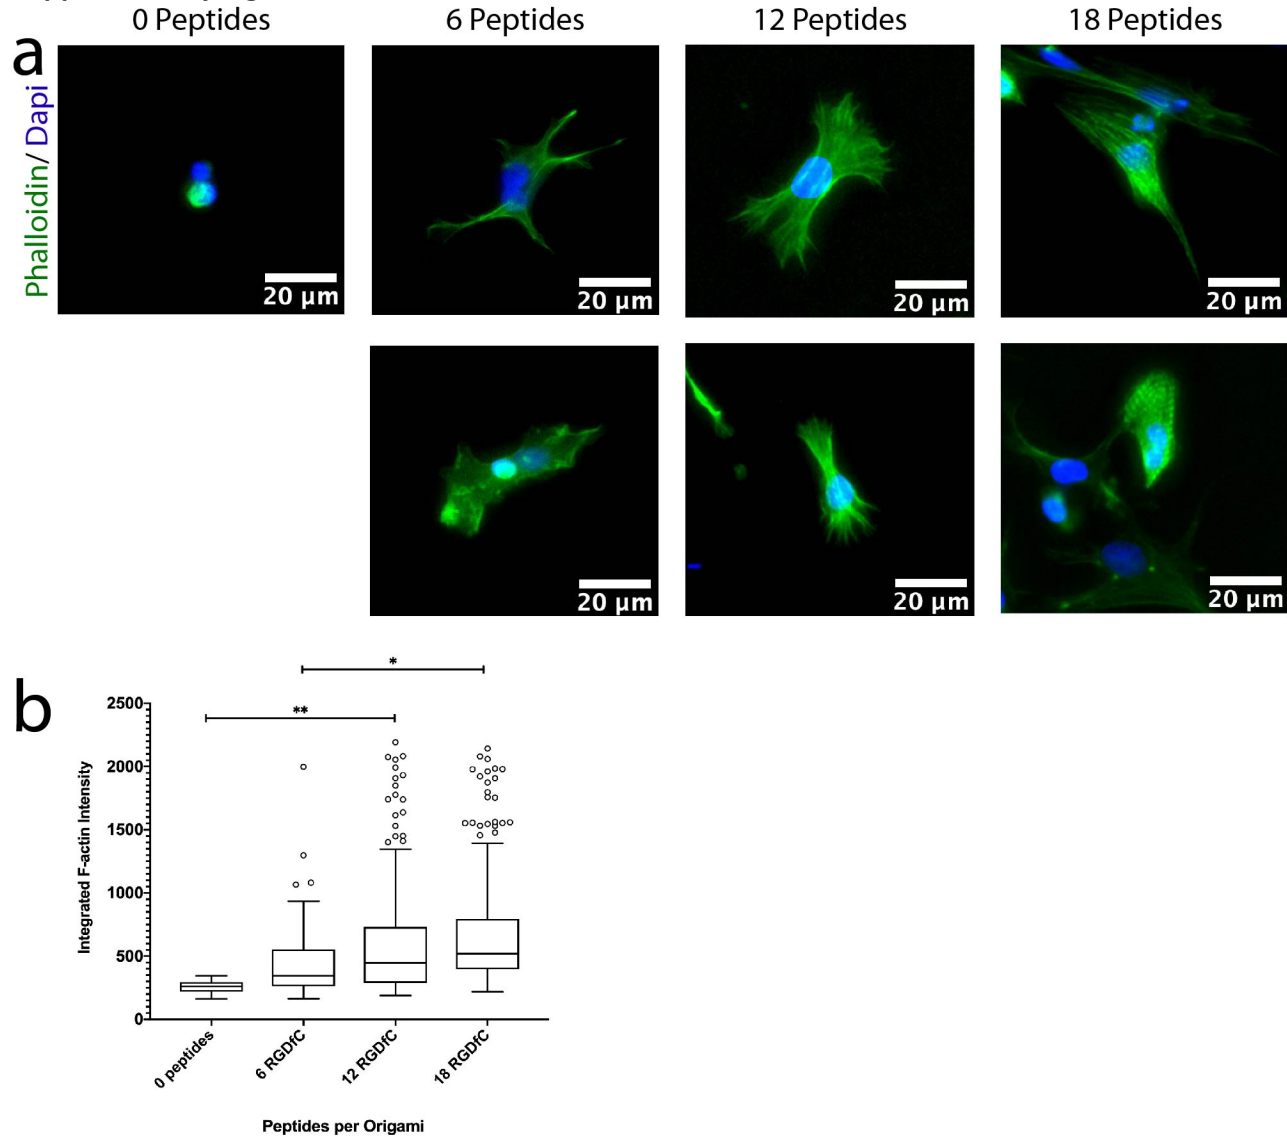

**Supplementary Figure 2:** Increasing the number of peptides on randomly positioned DNA origami promotes myofibril assembly and maturation. a) Only diffuse actin staining or stress-fibre like structures are detected when less than 12 peptides are attached per origami, but sarcomeric striations become detectable at higher peptide densities. b) Increasing actin organisation is also evident from the phalloidin staining intensities. p values were calculated using a one-way ANOVA and Tukey correction for multiple comparisons. \* =  $p < 0.05$ ; \*\* =  $p < 0.01$
